# Supplementary material for: Response Variability to Drug Testing in Two Models of Chemically Induced Colitis
Source: MDPI journal article supplement (doi:10.3390/ijms24076424), 2023-03-29
Supplement: s1 [file s1]

## Supplementary figures

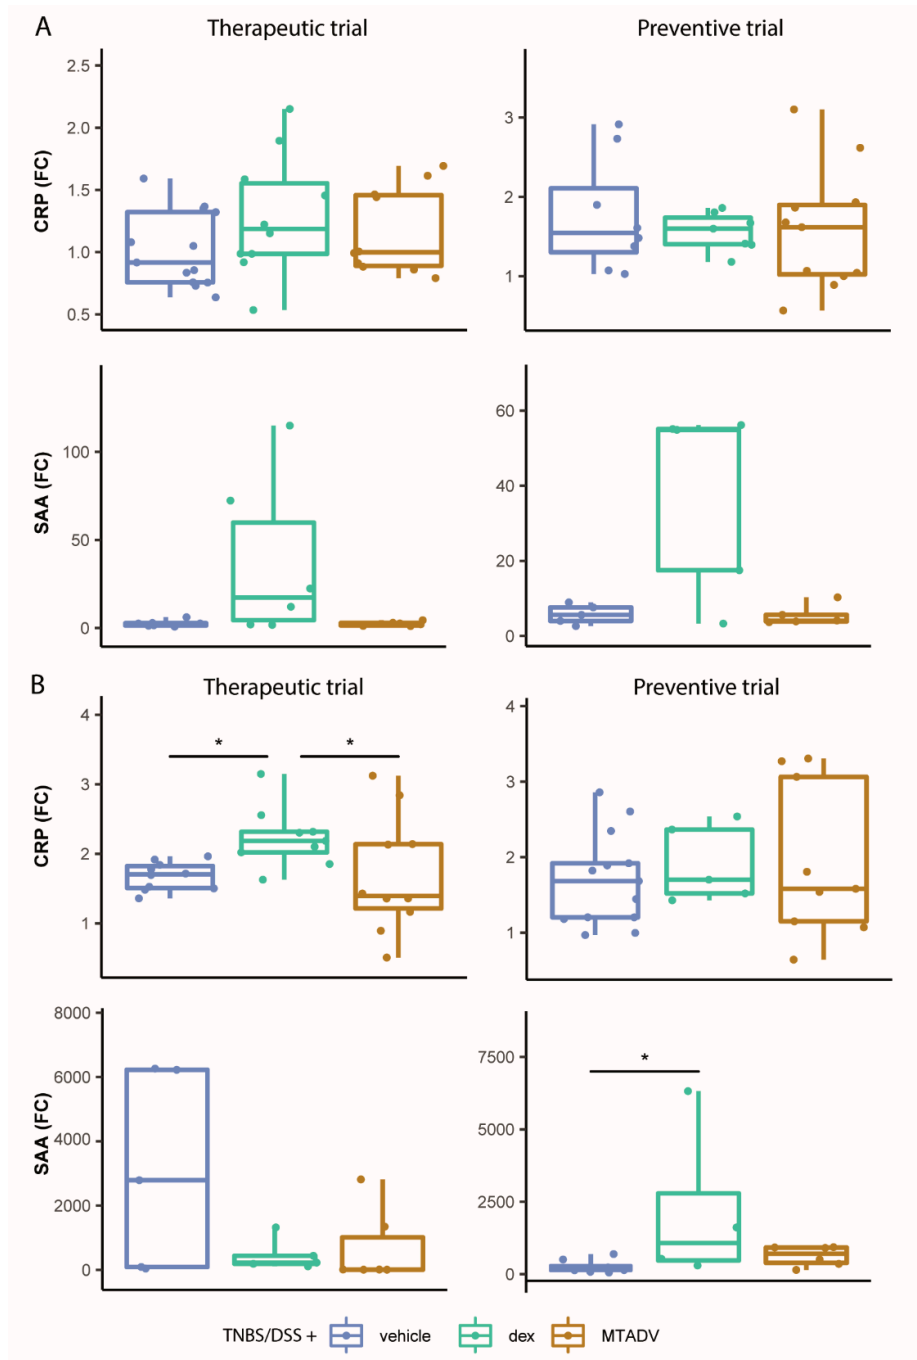

**Figure S1.** Concentration of plasmatic APP in each treatment group. APP protein concentration is expressed as ng/ml for CRP and ug/ml for SAA for both therapeutic and preventive trials in the TNBS (A) and DSS (B) models. Data are represented as points summarized in boxplots indicating IQR and bars indicating maximum and minimum. The median point is depicted as a bar inside the box. Treatment groups are differentiated using colours. Asterisks mark significance between the groups indicated by lines (Kruskal-Wallis test with a post-hoc Dunn's test). Significance levels are: \*p-value $\leq$ 0.05; \*\*p-value $\leq$ 0.01; \*\*\*p-value $\leq$ 0.001. APP, acute-phase protein; CRP, C-reactive protein; dex, dexamethasone; DSS, dextran sulphate sodium; FC, fold change; IQR, interquartile range; SAA, Serum Amyloid Antigen; MTADV, 5-MER peptide methionine-threonine-alanine-aspartic acid-valine; TNBS, trinitrobenzenesulfonic acid.

## Supplementary tables

**Table S1.** BLI raw data correlation to mRNA from inflammatory and oxidative stress markers in all the animal groups stratified by sex.

|                   |        | <i>Il10</i> | <i>Tgfb1</i> | <i>Il6</i> | <i>Vegfa</i> | <i>Tjp1</i> | <i>Nos2</i> | <i>Tnfa</i> | <i>Hif1a</i> | <i>Il1b1</i> |
|-------------------|--------|-------------|--------------|------------|--------------|-------------|-------------|-------------|--------------|--------------|
| <b>Both sexes</b> | pvalue | 0.70        | 0.04         | 0.06       | 0.01         | 0.02        | 0.01        | 0.032       | 0.87         | 0.09         |
|                   | rho    | -0.04       | -0.19        | 0.18       | -0.24        | -0.22       | 0.25        | 0.20        | 0.02         | 0.16         |
| <b>F</b>          | pvalue | 0.03        | 0.26         | 0.01       | 0.96         | 0.36        | 0.25        | 0.072       | 0.32         | 0.03         |
|                   | rho    | 0.29        | 0.15         | 0.33       | 0.00         | -0.12       | 0.15        | 0.24        | 0.13         | 0.29         |
| <b>M</b>          | pvalue | 0.63        | 0.00         | 0.81       | 0.00         | 0.02        | 0.01        | 0.22        | 0.57         | 0.63         |
|                   | rho    | 0.07        | -0.43        | 0.03       | -0.46        | -0.3        | 0.34        | 0.17        | -0.08        | 0.07         |

Spearman correlation analyses. Red and blue colors indicate significant ( $p \leq 0.05$ ) negative and positive correlations, respectively. BLI; Bioluminescence intensity; DSS, dextran sulfate sodium; F, female; M, male; TNBS, trinitrobenzenesulfonic acid.

**Table S2.** BLI raw data correlation to mRNA anti-inflammatory/pro-inflammatory markers of all the animal together and stratified by sex

|                   |        | <i>Il10/Il6</i> | <i>Tgfb1/Il6</i> | <i>Il10/Tnfa</i> | <i>Tgfb1/Tnfa</i> | <i>Il10/Il1b1</i> | <i>Tgfb1/Il1b1</i> |
|-------------------|--------|-----------------|------------------|------------------|-------------------|-------------------|--------------------|
| <b>Both sexes</b> | pvalue | 0.00            | 0.02             | 0.01             | 0.00              | 0.00              | 0.02               |
|                   | rho    | -0.31           | -0.22            | -0.28            | -0.25             | -0.32             | -0.22              |
| <b>F</b>          | pvalue | 0.00            | 0.02             | 0.03             | 0.03              | 0.00              | 0.03               |
|                   | rho    | -0.40           | -0.30            | -0.32            | -0.29             | -0.44             | -0.29              |
| <b>M</b>          | pvalue | 0.15            | 0.36             | 0.09             | 0.00              | 0.10              | 0.25               |
|                   | rho    | -0.22           | -0.13            | -0.26            | -0.37             | -0.25             | -0.16              |

Spearman correlation analyses. Red and blue colors indicate significant ( $p \leq 0.05$ ) negative and positive correlations. BLI, Bioluminescence intensity; DSS, dextran sulfate sodium; F, female; M, male; TNBS, trinitrobenzenesulfonic acid.

**Table S3.** BLI correlation to mRNA anti-inflammatory/pro-inflammatory markers of all the animals stratified by model and sex

|            |      |             |        | <i>Il10/Il6</i> | <i>Tgfb1/Il6</i> | <i>Il10/Tnfa</i> | <i>Tgfb1/Tnfa</i> | <i>Il10/Il1b1</i> | <i>Tgfb1/Il1b1</i> |
|------------|------|-------------|--------|-----------------|------------------|------------------|-------------------|-------------------|--------------------|
| Both sexes | TNBS | Therapeutic | pvalue | 0.62            | 0.68             | 0.53             | 0.41              | 0.36              | 0.45               |
|            |      |             | rho    | -0.12           | -0.08            | -0.15            | -0.15             | -0.23             | -0.14              |
|            |      | Preventive  | pvalue | 0.62            | 0.68             | 0.53             | 0.41              | 0.36              | 0.45               |
|            |      |             | rho    | -0.12           | -0.08            | -0.15            | -0.15             | -0.23             | -0.14              |
|            | DSS  | Therapeutic | pvalue | <b>0.00</b>     | <b>0.01</b>      | 0.06             | <b>0.04</b>       | <b>0.01</b>       | <b>0.03</b>        |
|            |      |             | rho    | <b>-0.48</b>    | <b>-0.48</b>     | -0.36            | <b>-0.40</b>      | <b>-0.47</b>      | <b>-0.41</b>       |
|            |      | Preventive  | pvalue | 0.45            | <b>0.04</b>      | 0.39             | 0.46              | 0.83              | 0.81               |
|            |      |             | rho    | 0.17            | <b>0.39</b>      | -0.19            | -0.15             | -0.05             | 0.05               |
| F          | TNBS | Therapeutic | pvalue | 0.08            | 0.16             | 0.61             | 0.70              | <b>0.02</b>       | <b>0.02</b>        |
|            |      |             | rho    | -0.59           | -0.37            | -0.19            | -0.11             | <b>-0.77</b>      | <b>-0.61</b>       |
|            |      | Preventive  | pvalue | 0.15            | 0.23             | 0.33             | 0.87              | 0.11              | 0.5                |
|            |      |             | rho    | 0.47            | 0.33             | 0.33             | -0.05             | 0.52              | 0.19               |
|            | DSS  | Therapeutic | pvalue | 0.33            | 0.43             | 0.70             | 0.52              | 0.24              | 0.49               |
|            |      |             | rho    | -0.27           | -0.22            | 0.11             | 0.18              | -0.33             | -0.19              |
|            |      | Preventive  | pvalue | 0.14            | 0.09             | 0.43             | 0.24              | 0.69              | 0.44               |
|            |      |             | rho    | 0.48            | 0.5              | -0.26            | -0.37             | -0.14             | -0.24              |
| M          | TNBS | Therapeutic | pvalue | 0.13            | 0.43             | 1.00             | 0.32              | 0.44              | 0.37               |
|            |      |             | rho    | 0.55            | 0.17             | -0.00            | -0.25             | 0.3               | 0.24               |
|            |      | Preventive  | pvalue | 0.91            | 0.89             | 0.86             | 0.52              | 0.61              | 0.90               |
|            |      |             | rho    | -0.05           | -0.06            | -0.07            | -0.22             | -0.19             | -0.05              |
|            | DSS  | Therapeutic | pvalue | 0.22            | 0.52             | <b>0.03</b>      | <b>0.04</b>       | 0.72              | 0.39               |
|            |      |             | rho    | -0.37           | -0.20            | <b>-0.60</b>     | <b>-0.58</b>      | 0.12              | 0.27               |
|            |      | Preventive  | pvalue | 0.44            | <b>0.05</b>      | 0.78             | 0.78              | 0.6               | 0.21               |
|            |      |             | rho    | 0.24            | <b>0.52</b>      | -0.09            | -0.08             | 0.17              | 0.34               |

Spearman correlation analyses. Red and blue colors indicate significant ( $p \leq 0.05$ ) negative and positive correlations. BLI, Bioluminescence; DSS, dextran sulfate sodium; F, female; M, male; RD, Raw data; TNBS, trinitrobenzenesulfonic acid.

**Table S4.** Macroscopic evaluation measurements (median  $\pm$  SD) stratified by model, trial and sex compared by treatment and between sexes in each treatment group.

|      |             |                            | median ± SD (UMW) |             |          |             |       |             |       | p-value (Dunn's test) |            |              |
|------|-------------|----------------------------|-------------------|-------------|----------|-------------|-------|-------------|-------|-----------------------|------------|--------------|
|      |             |                            | Gene              | Sex         | controls | p-value     | dex   | p-value     | MTADV | p-value               | ctl vs dex | ctl vs MTADV |
| TNBS | Therapeutic | Spleen weight (g)          | F                 | 0.13 ± 0.06 | ns       | 0.04 ± 0.01 | ns    | 0.1 ± 0.02  | ns    | 0.007                 | ns         | 0.025        |
|      |             |                            | M                 | 0.09 ± 0.02 |          | 0.07 ± 0.02 |       | 0.09 ± 0.01 |       | 0.042                 | ns         | 0.050        |
|      |             | Colon weight/length (g/cm) | F                 | 0.03 ± 0.01 | ns       | 0.03 ± 0    | ns    | 0.04 ± 0.01 | ns    | ns                    | ns         | 0.050        |
|      |             |                            | M                 | 0.04 ± 0.01 |          | 0.03 ± 0.01 |       | 0.03 ± 0.01 |       | ns                    | ns         | ns           |
|      |             | Hyperaemia                 | F                 | 0.83 ± 0.98 | ns       | 0.4 ± 0.55  | ns    | 0.8 ± 0.84  | ns    | ns                    | ns         | ns           |
|      |             |                            | M                 | 0.71 ± 0.76 |          | 0.4 ± 0.55  |       | 0.8 ± 0.84  |       | ns                    | ns         | ns           |
|      |             | Strictures number          | F                 | 1.67 ± 0.82 | ns       | 1.2 ± 0.84  | ns    | 1.8 ± 0.84  | ns    | ns                    | ns         | ns           |
|      |             |                            | M                 | 2 ± 0.82    |          | 1.4 ± 0.89  |       | 2.2 ± 1.48  |       | ns                    | ns         | ns           |
|      |             | Wallace score              | F                 | 3 ± 0.89    | ns       | 1.8 ± 1.3   | ns    | 3.6 ± 0.55  | ns    | ns                    | ns         | 0.015        |
|      |             |                            | M                 | 2.71 ± 0.49 |          | 1.8 ± 1.1   |       | 2.4 ± 1.34  |       | ns                    | ns         | ns           |
|      |             | Adherences                 | F                 | 2.33 ± 0.82 | ns       | 0.6 ± 0.55  | ns    | 2.4 ± 0.89  | 0.049 | 0.011                 | ns         | 0.011        |
|      |             |                            | M                 | 1.57 ± 0.79 |          | 0.6 ± 0.55  |       | 1 ± 0.71    |       | 0.031                 | ns         | ns           |
|      | Preventive  | Spleen weight (g)          | F                 | 0.06 ± 0.02 | ns       | 0.06 ± 0.02 | ns    | 0.05 ± 0.02 | ns    | ns                    | ns         | ns           |
|      |             |                            | M                 | 0.06 ± 0.02 |          | 0.06 ± 0.01 |       | 0.08 ± 0.01 |       | ns                    | ns         | 0.050        |
|      |             | Colon weight/length (g/cm) | F                 | 0.03 ± 0    | 0.029    | 0.03 ± 0    | ns    | 0.03 ± 0    | 0.009 | 0.015                 | ns         | 0.050        |
|      |             |                            | M                 | 0.04 ± 0    |          | 0.03 ± 0    |       | 0.04 ± 0    |       | 0.029                 | ns         | 0.017        |
|      |             | Hyperaemia                 | F                 | 1.75 ± 1.26 | ns       | 1.4 ± 0.55  | ns    | 1.57 ± 0.53 | ns    | ns                    | ns         | ns           |
|      |             |                            | M                 | 1.75 ± 0.96 |          | 1.25 ± 0.5  |       | 1.4 ± 0.89  |       | ns                    | ns         | ns           |
|      |             | Strictures number          | F                 | 2 ± 0       | ns       | 0.6 ± 0.89  | ns    | 1.43 ± 0.79 | ns    | 0.013                 | ns         | ns           |
|      |             |                            | M                 | 2.5 ± 1.29  |          | 1.5 ± 0.58  |       | 0.6 ± 0.55  |       | ns                    | 0.012      | ns           |
|      |             | Wallace score              | F                 | 3 ± 1.5     | ns       | 5 ± 1       | ns    | 3 ± 1       | ns    | ns                    | ns         | ns           |
|      |             |                            | M                 | 3.5 ± 1     |          | 5 ± 2       |       | 3 ± 2       |       | ns                    | ns         | ns           |
|      |             | Adherences                 | F                 | 1.5 ± 0.71  | ns       | 2.2 ± 1.3   | ns    | 1.33 ± 1.03 | ns    | ns                    | ns         | ns           |
|      |             |                            | M                 | 1.5 ± 0.58  |          | 2.33 ± 1.53 |       | 1.33 ± 0.58 |       | ns                    | ns         | ns           |
| DSS  | Therapeutic | Spleen weight (g)          | F                 | 0.1 ± 0.03  | ns       | 0.04 ± 0    | ns    | 0.08 ± 0.01 | ns    | 0.004                 | ns         | 0.016        |
|      |             |                            | M                 | 0.08 ± 0.02 |          | 0.05 ± 0.02 |       | 0.11 ± 0.05 |       | ns                    | ns         | 0.003        |
|      |             | Colon weight/length (g/cm) | F                 | 0.1 ± 0.03  | 0.008    | 0.04 ± 0    | ns    | 0.08 ± 0.01 | 0.008 | ns                    | ns         | ns           |
|      |             |                            | M                 | 0.04 ± 0    |          | 0.03 ± 0.01 |       | 0.04 ± 0.01 |       | 0.031                 | ns         | 0.021        |
|      |             | Hyperaemia                 | F                 | 1.4 ± 0.55  | ns       | 1.4 ± 0.55  | ns    | 1.6 ± 0.55  | ns    | ns                    | ns         | ns           |
|      |             |                            | M                 | 1.8 ± 0.84  |          | 1 ± 0       |       | 1.6 ± 0.55  |       | 0.050                 | ns         | ns           |
|      |             | Strictures number          | F                 | 1.6 ± 1.52  | ns       | 2 ± 1       | ns    | 2.4 ± 1.14  | ns    | ns                    | ns         | ns           |
|      |             |                            | M                 | 1.2 ± 0.45  |          | 1 ± 1       |       | 1 ± 1       |       | ns                    | ns         | ns           |
|      |             | Wallace score              | F                 | 5.2 ± 2.05  | ns       | 3.6 ± 1.34  | ns    | 3 ± 0       | ns    | ns                    | 0.032      | ns           |
|      |             |                            | M                 | 4.4 ± 3.13  |          | 3 ± 0       |       | 3 ± 0       |       | ns                    | ns         | ns           |
|      |             | Adherences                 | F                 | 1 ± 0       | ns       | 0.4 ± 0.55  | 0.041 | 2.2 ± 0.84  | ns    | ns                    | ns         | 0.002        |
|      |             |                            | M                 | 2.2 ± 1.1   |          | 1.4 ± 0.55  |       | 2.4 ± 0.55  |       | ns                    | ns         | ns           |
|      | Preventive  | Spleen weight (g)          | F                 | 0.1 ± 0.06  | ns       | 0.11 ± 0.01 | ns    | 0.11 ± 0.03 | ns    | ns                    | ns         | ns           |
|      |             |                            | M                 | 0.13 ± 0.05 |          | 0.13 ± 0.04 |       | 0.12 ± 0.04 |       | ns                    | ns         | ns           |
|      |             | Colon weight/length (g/cm) | F                 | 0.03 ± 0.01 | ns       | 0.03 ± 0    | ns    | 0.03 ± 0    | ns    | ns                    | ns         | ns           |
|      |             |                            | M                 | 0.03 ± 0.01 |          | 0.03 ± 0    |       | 0.03 ± 0    |       | ns                    | ns         | ns           |
|      |             | Hyperaemia                 | F                 | 1.17 ± 0.41 | ns       | 1.33 ± 0.58 | ns    | 1.8 ± 0.84  | ns    | ns                    | ns         | ns           |
|      |             |                            | M                 | 1.57 ± 0.98 |          | 0.67 ± 0.58 |       | 1.2 ± 0.45  |       | ns                    | ns         | ns           |
|      |             | Strictures number          | F                 | 0 ± 0       | ns       | 0 ± 0       | ns    | 0.4 ± 0.89  | ns    | ns                    | ns         | ns           |
|      |             |                            | M                 | 0.43 ± 0.79 |          | 1 ± 0       |       | 0 ± 0       |       | ns                    | ns         | 0.010        |
|      |             | Wallace score              | F                 | 8 ± 1.79    | 0.016    | 5.67 ± 3.21 | ns    | 5.6 ± 1.52  | ns    | ns                    | 0.050      | ns           |
|      |             |                            | M                 | 3.71 ± 2.5  |          | 5.67 ± 2.52 |       | 5.2 ± 1.79  |       | ns                    | ns         | ns           |
|      |             | Adherences                 | F                 | 1.67 ± 1.03 | ns       | 2 ± 0       | ns    | 1.6 ± 0.89  | ns    | ns                    | ns         | ns           |
|      |             |                            | M                 | 1.86 ± 0.38 |          | 2.33 ± 0.58 |       | 0.8 ± 0.45  |       | ns                    | 0.010      | 0.004        |

Data are given as median  $\pm$  sd and the result of the statistical test between groups is given as p-value. DSS, dextran sulfate sodium; F, female; M, male; MTADV, 5-MER peptide methionine-threonine-alanine-aspartic acid-valine; ns, non-significant; SD, standard deviation; TNBS, trinitrobenzenesulfonic acid.

**Table S5.** mRNA expression (FC) of inflammatory and oxidative stress markers stratified by both trial and sex in the TNBS models compared by treatment and between sexes in each treatment group.

|      |             |       | median (IQR; UMW) |                |               |                  |                |                 | p-value (Dunn's test) |         |            |              |
|------|-------------|-------|-------------------|----------------|---------------|------------------|----------------|-----------------|-----------------------|---------|------------|--------------|
|      |             |       | Gene              | Sex            | controls      | p-value          | dex            | p-value         | MTADV                 | p-value | ctl vs dex | ctl vs MTADV |
| TNBS | Therapeutic | Hif1a | F                 | 1.1 (1-1.3)    | ns            | 1.2 (1.1-1.4)    | ns             | 1.6 (1.4-2.5)   | ns                    | ns      | ns         | ns           |
|      |             |       | M                 | 1.3 (1-1.4)    |               | 1.2 (1-1.4)      |                | 1.4 (1.3-1.4)   |                       | ns      | ns         | ns           |
|      |             | Il10  | F                 | 0.8 (0.6-0.9)  | ns            | 0.4 (0.4-0.7)    | ns             | 1 (0.7-1.1)     | ns                    | ns      | ns         | ns           |
|      |             |       | M                 | 0.4 (0.4-0.5)  |               | 0.6 (0.6-0.7)    |                | 0.8 (0.5-1.2)   |                       | ns      | ns         | ns           |
|      |             | Il6   | F                 | 1.4 (1-1.5)    | ns            | 0.7 (0.6-0.8)    | ns             | 36.5 (1.7-45)   | ns                    | ns      | ns         | 0.003        |
|      |             |       | M                 | 0.7 (0.6-1)    |               | 0.8 (0.6-0.9)    |                | 1.6 (1.2-1.9)   |                       | ns      | 0.050      | 0.040        |
|      |             | Nos2  | F                 | 0.8 (0.6-1.3)  | 0.012         | 0.5 (0.4-0.6)    | ns             | 1.2 (0.5-1.5)   | ns                    | ns      | ns         | ns           |
|      |             |       | M                 | 0.3 (0.3-0.4)  |               | 0.4 (0.4-0.4)    |                | 0.8 (0.6-0.9)   |                       | ns      | 0.027      | ns           |
|      |             | Tgfb1 | F                 | 1.4 (1.3-2)    | ns            | 1.3 (1.2-1.4)    | ns             | 2.7 (2.3-2.8)   | ns                    | ns      | ns         | 0.009        |
|      |             |       | M                 | 1.4 (1.1-1.5)  |               | 1.3 (1.1-1.4)    |                | 2.3 (2.2-2.4)   |                       | ns      | 0.008      | 0.006        |
|      |             | Tnfa  | F                 | 0.9 (0.8-1.2)  | 0.017         | 0.7 (0.6-0.8)    | ns             | 1 (0.9-1)       | ns                    | ns      | ns         | 0.046        |
|      |             |       | M                 | 0.6 (0.5-0.6)  |               | 0.5 (0.4-0.8)    |                | 0.8 (0.7-1.1)   |                       | ns      | 0.040      | ns           |
|      |             | Vegfa | F                 | 1.4 (1.2-1.6)  | ns            | 1.4 (1.3-1.6)    | ns             | 1.5 (1.5-1.6)   | ns                    | ns      | ns         | ns           |
|      |             |       | M                 | 1.3 (1.1-1.4)  |               | 1.5 (1.1-1.8)    |                | 1.5 (1.4-1.5)   |                       | ns      | ns         | ns           |
|      |             | Tpj1  | F                 | 1.3 (1.1-1.5)  | ns            | 1.5 (1.5-1.8)    | ns             | 1.4 (1.3-1.7)   | ns                    | ns      | ns         | ns           |
|      |             |       | M                 | 1.3 (1.3-1.7)  |               | 1.7 (1-1.7)      |                | 1.5 (1.5-1.7)   |                       | ns      | ns         | ns           |
|      | Il1b1       | F     | 1.4 (0.8-1.6)     | ns             | 1 (0.6-1.2)   | ns               | 4.2 (1.4-24.3) | ns              | ns                    | ns      | 0.019      |              |
|      |             | M     | 0.4 (0.4-0.6)     |                | 0.4 (0.3-1.1) |                  | 2.1 (0.9-2.2)  |                 | ns                    | 0.038   | 0.028      |              |
|      | Preventive  | Hif1a | F                 | 1.1 (1.1-1.3)  | ns            | 1.7 (1.4-1.8)    | ns             | 2.7 (2.1-2.9)   | ns                    | ns      | 0.001      | 0.018        |
|      |             |       | M                 | 1.6 (1.5-1.8)  |               | 2.1 (1.5-2.2)    |                | 2.3 (2.1-3.3)   |                       | ns      | ns         | ns           |
|      |             | Il10  | F                 | 0.8 (0.8-0.8)  | ns            | 0.4 (0.3-0.5)    | ns             | 0.8 (0.7-0.9)   | ns                    | ns      | ns         | 0.018        |
|      |             |       | M                 | 0.6 (0.5-0.8)  |               | 0.8 (0.6-1)      |                | 1 (0.9-1.2)     |                       | ns      | ns         | ns           |
|      |             | Il6   | F                 | 1.7 (1.6-1.9)  | ns            | 9.6 (4.7-21.7)   | ns             | 21.8 (5.8-81.6) | ns                    | ns      | 0.050      | ns           |
|      |             |       | M                 | 9.6 (0.8-46.4) |               | 84.6 (54.3-93.8) |                | 52.9 (1.9-128)  |                       | ns      | ns         | ns           |
|      |             | Nos2  | F                 | 0.7 (0.5-0.9)  | 0.002         | 1.4 (1.2-1.6)    | ns             | 0.8 (0.8-2)     | 0.039                 | 0.030   | ns         | ns           |
|      |             |       | M                 | 2 (1.5-2.5)    |               | 2.3 (1.3-2.5)    |                | 3.3 (2.1-3.5)   |                       | ns      | ns         | ns           |
|      |             | Tgfb1 | F                 | 1.5 (1.4-1.5)  | ns            | 1.9 (1.8-1.9)    | ns             | 2.6 (1.7-2.8)   | ns                    | ns      | 0.041      | ns           |
|      |             |       | M                 | 1.3 (1.1-1.6)  |               | 1.8 (1.6-2.2)    |                | 1.7 (1.6-3.9)   |                       | ns      | ns         | ns           |
|      |             | Tnfa  | F                 | 0.8 (0.7-0.9)  | ns            | 1.3 (1.3-1.4)    | ns             | 1.3 (1.2-1.9)   | ns                    | ns      | ns         | ns           |
|      |             |       | M                 | 1.1 (1-1.4)    |               | 1.8 (1.2-2.4)    |                | 1.6 (1.6-2)     |                       | ns      | ns         | ns           |
|      |             | Vegfa | F                 | 1.2 (1.1-1.2)  | ns            | 1.7 (1.2-1.7)    | ns             | 1.9 (1.5-2.1)   | ns                    | ns      | 0.050      | ns           |
|      |             |       | M                 | 1.4 (1.1-1.7)  |               | 1.7 (1.5-1.8)    |                | 1.5 (1.2-2.2)   |                       | ns      | ns         | ns           |
|      |             | Tpj1  | F                 | 1.4 (1.3-1.5)  | ns            | 1.1 (1.1-1.1)    | ns             | 1.6 (1.3-1.8)   | ns                    | ns      | ns         | 0.024        |
|      |             |       | M                 | 1.3 (1-1.5)    |               | 1.4 (1.3-1.6)    |                | 1.6 (1.5-1.7)   |                       | ns      | ns         | ns           |
|      |             | Il1b1 | F                 | 1 (0.7-1.6)    | ns            | 4.9 (3.3-28.2)   | ns             | 4.9 (2.8-12.6)  | ns                    | 0.016   | 0.024      | ns           |
|      |             |       | M                 | 7 (1.3-32)     |               | 7.5 (6.8-33.9)   |                | 2.8 (2.6-30.7)  |                       | ns      | ns         | ns           |

Data are given as median (IQR) and the result of the statistical test between groups is given as p-value. F, female; FC, Fold-change; IQR, interquartile range; M, male; MTADV, 5-MER peptide methionine-threonine-alanine-aspartic acid-valine; ns, non-significant, TNBS, trinitrobenzenesulfonic acid, UMW; U Mann Whitney.

**Table S6.** mRNA expression (FC) of inflammatory and oxidative stress markers stratified by both trial and sex in the DSS models compared by treatment and between sexes in each treatment group.

|     |             |       |   | median (IQR; UMW) |         |                    |         |                   | p-value (Dunn's test) |            |              |              |
|-----|-------------|-------|---|-------------------|---------|--------------------|---------|-------------------|-----------------------|------------|--------------|--------------|
|     |             |       |   | controls          | p-value | dex                | p-value | MTADV             | p-value               | ctl vs dex | ctl vs MTADV | dex vs MTADV |
| DSS | Therapeutic | Hif1a | F | 2.6 (2.1-3)       | ns      | 1.8 (1.3-2.3)      | ns      | 1.1 (0.8-1.2)     | ns                    | ns         | 0.006        | ns           |
|     |             |       | M | 1.6 (1.6-2.9)     |         | 2.2 (1.7-2.3)      |         | 1.9 (1.7-2.3)     |                       | ns         | ns           | ns           |
|     |             | Il10  | F | 1.3 (1.2-1.3)     | ns      | 1.5 (1.2-1.9)      | ns      | 1.3 (1.1-1.4)     | ns                    | ns         | ns           | ns           |
|     |             |       | M | 1.5 (1-3.5)       |         | 1.3 (1.2-1.4)      |         | 0.8 (0.8-0.8)     |                       | ns         | 0.040        | ns           |
|     |             | Il6   | F | 2.8 (2.6-4.8)     | 0.009   | 9.4 (4.6-13.1)     | ns      | 0.9 (0.8-1.8)     | 0.001                 | ns         | ns           | 0.009        |
|     |             |       | M | 69.9 (30.3-83)    |         | 29.5 (25.8-41.4)   |         | 30.4 (25.1-33.7)  |                       | ns         | ns           | ns           |
|     |             | Nos2  | F | 1.4 (0.9-2)       | 0.009   | 0.5 (0.5-0.9)      | ns      | 2.6 (2.1-2.6)     | ns                    | ns         | ns           | 0.004        |
|     |             |       | M | 4.5 (3.4-6.5)     |         | 1.7 (1.4-1.7)      |         | 8.2 (5.3-12.2)    |                       | 0.048      | ns           | 0.007        |
|     |             | Tgfb1 | F | 1.6 (1.5-1.6)     | ns      | 1.4 (1.4-1.5)      | ns      | 1.2 (1.2-1.6)     | ns                    | ns         | ns           | ns           |
|     |             |       | M | 1.3 (0.8-1.5)     |         | 1.3 (1.2-1.9)      |         | 1.3 (0.7-1.3)     |                       | ns         | ns           | ns           |
|     |             | Tnfa  | F | 1.7 (1.6-2.7)     | ns      | 0.9 (0.7-1.1)      | ns      | 1.5 (1.4-1.5)     | 0.013                 | 0.002      | ns           | 0.024        |
|     |             |       | M | 2.2 (2-2.7)       |         | 1.5 (0.9-1.6)      |         | 3.1 (2.9-3.6)     |                       | ns         | ns           | 0.004        |
|     |             | Vegfa | F | 1.1 (1.1-1.2)     | 0.017   | 2 (1.7-2)          | ns      | 0.8 (0.8-1.1)     | ns                    | 0.034      | ns           | 0.003        |
|     |             |       | M | 0.8 (0.7-0.9)     |         | 1.1 (1-1.2)        |         | 0.9 (0.8-0.9)     |                       | 0.011      | ns           | 0.034        |
|     |             | Tpj1  | F | 1.6 (1.5-1.7)     | 0.017   | 1.7 (1.6-1.7)      | ns      | 0.8 (0.7-1)       | ns                    | ns         | 0.016        | 0.004        |
|     |             |       | M | 0.9 (0.9-1)       |         | 1.4 (1.3-1.5)      |         | 0.7 (0.7-0.7)     |                       | ns         | ns           | 0.001        |
|     |             | Il1b1 | F | 3.3 (2.4-4.5)     | 0.029   | 3.2 (2.7-4.4)      | 0.031   | 1.8 (1.5-2.5)     | 0.004                 | ns         | ns           | ns           |
|     |             |       | M | 26.1 (16.7-37.4)  |         | 21.5 (10.1-39)     |         | 14.1 (8.5-14.8)   |                       | ns         | ns           | ns           |
|     | Preventive  | Hif1a | F | 1.1 (1.1-1.2)     | ns      | 1.4 (1.2-1.7)      | 0.024   | 1.3 (1.2-1.6)     | 0.049                 | ns         | ns           | ns           |
|     |             |       | M | 1.6 (1.4-1.7)     |         | 2.9 (2.9-3.5)      |         | 2.4 (1.9-2.5)     |                       | 0.003      | 0.029        | ns           |
|     |             | Il10  | F | 0.8 (0.7-0.9)     | ns      | 1.4 (1.3-1.5)      | ns      | 0.8 (0.8-1)       | ns                    | ns         | ns           | ns           |
|     |             |       | M | 1.1 (0.5-1.8)     |         | NA (NA-NA)         |         | 0.8 (0.7-1.1)     |                       | NA         | ns           | NA           |
|     |             | Il6   | F | 16.2 (12.4-18.1)  | ns      | 33.9 (33-45.2)     | 0.035   | 21.3 (16.6-40.3)  | 0.034                 | ns         | ns           | ns           |
|     |             |       | M | 59 (21.8-79.5)    |         | 701 (445.9-2012.7) |         | 148.5 (116-167.9) |                       | 0.002      | ns           | ns           |
|     |             | Nos2  | F | 2.6 (2.2-2.7)     | 0.009   | 3.7 (2.7-3.8)      | ns      | 3.2 (2.9-5)       | ns                    | ns         | ns           | ns           |
|     |             |       | M | 3.3 (2.5-4.7)     |         | 1.4 (1.4-1.8)      |         | 4.4 (4-5.2)       |                       | ns         | ns           | 0.030        |
|     |             | Tgfb1 | F | 1.3 (1.2-1.3)     | ns      | 1.4 (1.2-1.5)      | 0.013   | 1.7 (1.6-1.8)     | ns                    | ns         | 0.033        | ns           |
|     |             |       | M | 1.4 (1.2-1.8)     |         | 2.5 (2.2-2.6)      |         | 2.2 (1.9-2.4)     |                       | 0.013      | 0.044        | ns           |
|     |             | Tnfa  | F | 2.4 (1.8-2.5)     | ns      | 2.6 (2.4-2.7)      | ns      | 2.1 (2-2.3)       | 0.015                 | ns         | ns           | ns           |
|     |             |       | M | 2.5 (1.9-3.1)     |         | 4.1 (3.2-4.1)      |         | 3.5 (3.4-5.2)     |                       | ns         | 0.031        | ns           |
|     |             | Vegfa | F | 0.9 (0.8-0.9)     | ns      | 0.7 (0.7-0.8)      | 0.003   | 0.9 (0.9-1)       | ns                    | ns         | ns           | 0.02         |
|     |             |       | M | 0.7 (0.7-0.8)     |         | 1.8 (1.4-1.9)      |         | 0.9 (0.8-0.9)     |                       | 0.003      | ns           | ns           |
|     |             | Tpj1  | F | 0.9 (0.9-1)       | ns      | 0.5 (0.5-0.5)      | ns      | 0.6 (0.6-0.6)     | ns                    | 0.002      | ns           | ns           |
|     |             |       | M | 0.6 (0.6-0.9)     |         | 0.6 (0.6-0.7)      |         | 0.8 (0.7-0.8)     |                       | ns         | ns           | ns           |
|     |             | Il1b1 | F | 6 (4.7-7.6)       | ns      | 7.7 (7.4-11.8)     | ns      | 12.8 (10.9-15.7)  | ns                    | ns         | ns           | ns           |
|     |             |       | M | 16.3 (9.4-29.7)   |         | 34.3 (26.5-38.7)   |         | 27 (26.7-34.3)    |                       | ns         | ns           | ns           |

Data are given as median (IQR) and the result of the statistical test between groups is given as p-value. DSS, dextran sulfate sodium; F, female; IQR, interquartile range; M, male; MTADV, 5-MER peptide methionine-threonine-alanine-aspartic acid-valine; ns, non-significant, UMW; U Mann Whitney.

**Table S7.** FCs of CRP and SAA stratified by sex in preventive and therapeutic approaches compared between treatments and between sex in each treatment group.

|      |             |     | APP | Sex                    | median (IQR; UMW) |                        |     |                        |       | p-value (Dunn's test) |            |              |
|------|-------------|-----|-----|------------------------|-------------------|------------------------|-----|------------------------|-------|-----------------------|------------|--------------|
|      |             |     |     |                        | controls          | p-value                | dex | p-value                | MTADV | p-value               | ctl vs dex | ctl vs MTADV |
| TNBS | Therapeutic | CRP | F   | 1.0 (0.8-1.3)          | ns                | 1.5 (1.2-1.6)          | ns  | 1.0 (0.9-1.5)          | ns    | ns                    | ns         | ns           |
|      |             |     | M   | 0.9 (0.8-1.2)          |                   | 1.0 (0.9-1.2)          |     | 1.0 (0.9-1.4)          |       | ns                    | ns         | ns           |
|      |             | SAA | F   | 1.6 (1.2-2.2)          | ns                | 22.4 (17.3-47.4)       | ns  | 2.1 (1.6-2.4)          | ns    | 0.037                 | ns         | ns           |
|      |             |     | M   | 2.6 (2.6-6.2)          |                   | 2.0 (1.9-58.4)         |     | 3.0 (2.1-3.7)          |       | ns                    | ns         | ns           |
|      | Preventive  | CRP | F   | 1.2 (1.1-1.4)          | ns                | 1.6 (1.4-1.7)          | ns  | 1.0 (0.9-1.7)          | ns    | ns                    | ns         | ns           |
|      |             |     | M   | 2.3 (1.8-2.8)          |                   | 1.8 (1.6-1.8)          |     | 1.7 (1.6-2.6)          |       | ns                    | ns         | ns           |
|      |             | SAA | F   | 4.0 (3.3-4.8)          | ns                | 17.5 (10.4-36.3)       | ns  | 7.2 (4-18.1)           | ns    | ns                    | ns         | ns           |
|      |             |     | M   | 8.9 (8.3-2988.3)       |                   | 56.2 (55.5-472.1)      |     | 4.7 (4.3-5.2)          |       | ns                    | ns         | 0.044        |
| DSS  | Therapeutic | CRP | F   | 1.7 (1.5-1.8)          | ns                | 2.1 (1.9-2.3)          | ns  | 1.2 (0.9-1.4)          | 0.001 | ns                    | 0.048      | 0.001        |
|      |             |     | M   | 1.7 (1.5-1.9)          |                   | 2.6 (2.2-3.1)          |     | 2.1 (2.1-2.8)          |       | 0.009                 | ns         | ns           |
|      |             | SAA | F   | 68.7 (56.8-80.6)       | 0.033             | 189.5 (151.0-315.8)    | ns  | 9.6 (7.6-11.9)         | 0.016 | ns                    | ns         | 0.009        |
|      |             |     | M   | 6224.3 (4508.1-6242.9) |                   | 1322.8 (775.5-3163.9)  |     | 2080.7 (1713.5-2447.8) |       | ns                    | ns         | ns           |
|      | Preventive  | CRP | F   | 1.2 (1-1.2)            | ns                | 1.5 (1.5-1.6)          | ns  | 1.4 (1.1-2.0)          | ns    | ns                    | ns         | ns           |
|      |             |     | M   | 1.9 (1.8-2.3)          |                   | 2.5 (2.4-2.5)          |     | 1.8 (1.5-3.1)          |       | ns                    | ns         | ns           |
|      |             | SAA | F   | 134.5 (79.1-140.6)     | ns                | 955.0 (626.5-1283.5)   | ns  | 924.3 (922.0-926.5)    | ns    | ns                    | ns         | ns           |
|      |             |     | M   | 367.3 (224.2-853.4)    |                   | 3424.5 (1977.1-4871.9) |     | 427.7 (300.7-603.5)    |       | ns                    | ns         | ns           |

Data are given as median (interquartile range) and the result of the statistical test between groups is given as p-value. DSS, dextran sulfate sodium; F, female; FC, fold change; IQR, interquartile range; M, male; MTADV, 5-MER peptide methionine-threonine-alanine-aspartic acid-valine; ns, non-significant, TNBS, trinitrobenzenesulfonic acid.

**Table S8.** Correlation between inflammatory and oxidative stress mRNA expression in both therapeutic and preventive approaches in the TNBS model in females.

|              | <i>Hif1a</i> | <i>Il10</i> | <i>Il6</i>  | <i>Nos2</i> | <i>Tgfb1</i> | <i>Tnfa</i> | <i>Vegfa</i> | <i>Tjp1</i> | <i>Il1b1</i> | Therapeutic |
|--------------|--------------|-------------|-------------|-------------|--------------|-------------|--------------|-------------|--------------|-------------|
| <i>Hif1a</i> |              | 0.21        | 0.42        | -0.19       | <b>0.64</b>  | -0.00       | <b>0.77</b>  | <b>0.51</b> | 0.17         |             |
| <i>Il10</i>  | 0.51         |             | -0.21       | 0.60        | 0.26         | <b>0.7</b>  | -0.30        | -0.04       | <b>0.75</b>  |             |
| <i>Il6</i>   | <b>0.64</b>  | -0.11       |             | 0.26        | 0.42         | 0.39        | 0.43         | -0.04       | <b>0.59</b>  |             |
| <i>Nos2</i>  | 0.34         | 0.29        | 0.33        |             | -0.16        | <b>0.61</b> | -0.27        | -0.41       | <b>0.55</b>  |             |
| <i>Tgfb1</i> | <b>0.62</b>  | 0.25        | <b>0.73</b> | 0.38        |              | 0.11        | 0.31         | 0.17        | 0.23         |             |
| <i>Tnfa</i>  | 0.50         | 0.04        | <b>0.73</b> | 0.41        | 0.49         |             | -0.28        | -0.47       | <b>0.78</b>  |             |
| <i>Vegfa</i> | <b>0.68</b>  | 0.01        | <b>0.83</b> | 0.24        | <b>0.56</b>  | <b>0.62</b> |              | 0.36        | -0.16        |             |
| <i>Tjp1</i>  | 0.46         | 0.57        | 0.10        | -0.31       | 0.36         | -0.18       | 0.29         |             | -0.20        |             |
| <i>Il1b1</i> | <b>0.64</b>  | -0.19       | <b>0.86</b> | <b>0.66</b> | <b>0.74</b>  | <b>0.66</b> | <b>0.71</b>  | -0.11       |              |             |
| Preventive   |              |             |             |             |              |             |              |             |              | Therapeutic |

Spearman linear regression analyses. Red and blue colors indicate significant ( $p \leq 0.05$ ) negative and positive correlations respectively. The grey diagonal division separates therapeutic (top), from preventive (bottom) correlations. TNBS, trinitrobenzenesulfonic acid.

**Table S9.** Correlation between inflammatory and oxidative stress mRNA expression in both therapeutic and preventive approaches in the TNBS model in males.

|              | <i>Hif1a</i> | <i>Il10</i> | <i>Il6</i>  | <i>Nos2</i> | <i>Tgfb1</i> | <i>Tnfa</i> | <i>Vegfa</i> | <i>Tjp1</i> | <i>Il1b1</i> | Therapeutic |
|--------------|--------------|-------------|-------------|-------------|--------------|-------------|--------------|-------------|--------------|-------------|
| <i>Hif1a</i> |              | 0.14        | 0.36        | 0.23        | 0.44         | 0.09        | 0.42         | <b>0.58</b> | 0.01         |             |
| <i>Il10</i>  | 0.49         |             | 0.23        | 0.48        | 0.32         | 0.56        | 0.01         | -0.27       | <b>0.85</b>  |             |
| <i>Il6</i>   | <b>0.81</b>  | 0.52        |             | 0.26        | <b>0.92</b>  | <b>0.64</b> | <b>0.65</b>  | <b>0.81</b> | 0.38         |             |
| <i>Nos2</i>  | 0.23         | 0.39        | 0.12        |             | 0.33         | 0.48        | 0.33         | -0.02       | 0.24         |             |
| <i>Tgfb1</i> | <b>0.88</b>  | 0.37        | <b>0.87</b> | 0.41        |              | <b>0.52</b> | 0.34         | <b>0.62</b> | 0.40         |             |
| <i>Tnfa</i>  | <b>0.63</b>  | 0.28        | <b>0.71</b> | <b>0.67</b> | <b>0.75</b>  |             | -0.27        | -0.01       | <b>0.77</b>  |             |
| <i>Vegfa</i> | <b>0.79</b>  | 0.36        | <b>0.93</b> | 0.27        | <b>0.89</b>  | <b>0.67</b> |              | <b>0.63</b> | -0.49        |             |
| <i>Tjp1</i>  | 0.19         | 0.28        | 0.16        | -0.04       | 0.18         | 0.02        | 0.24         |             | -0.19        |             |
| <i>Il1b1</i> | 0.57         | 0.15        | <b>0.86</b> | 0.32        | <b>0.73</b>  | <b>0.62</b> | <b>0.87</b>  | -0.08       |              |             |
| Preventive   |              |             |             |             |              |             |              |             |              | Therapeutic |

Spearman linear regression analyses. Red and blue colors indicate significant ( $p \leq 0.05$ ) negative and positive correlations respectively. The grey diagonal division separates therapeutic (top), from preventive (bottom) correlations. TNBS, trinitrobenzenesulfonic acid.



**Table S10.** Correlation between inflammatory and oxidative stress mRNA expression in both therapeutic and preventive approaches in the DSS model in females.

|              | <i>Hif1a</i> | <i>Il10</i> | <i>Il6</i> | <i>Nos2</i> | <i>Tgfb1</i> | <i>Tnfa</i> | <i>Vegfa</i> | <i>Tjp1</i> | <i>Il1b1</i> | Therapeutic |
|--------------|--------------|-------------|------------|-------------|--------------|-------------|--------------|-------------|--------------|-------------|
| <i>Hif1a</i> |              | 0.22        | 0.61       | -0.50       | 0.63         | 0.07        | 0.45         | 0.67        | 0.64         |             |
| <i>Il10</i>  | -0.07        |             | 0.60       | -0.41       | 0.46         | -0.38       | 0.59         | 0.16        | 0.48         |             |
| <i>Il6</i>   | 0.29         | 0.26        |            | -0.62       | 0.36         | -0.38       | 0.67         | 0.61        | 0.89         |             |
| <i>Nos2</i>  | 0.01         | 0.03        | 0.39       |             | -0.19        | 0.65        | -0.60        | -0.75       | -0.46        |             |
| <i>Tgfb1</i> | 0.45         | -0.23       | 0.11       | -0.25       |              | 0.38        | 0.32         | 0.35        | 0.39         |             |
| <i>Tnfa</i>  | 0.06         | -0.01       | 0.19       | 0.71        | -0.06        |             | -0.45        | -0.22       | -0.23        |             |
| <i>Vegfa</i> | -0.03        | -0.35       | -0.75      | -0.18       | 0.50         | -0.18       |              | 0.67        | 0.43         |             |
| <i>Tjp1</i>  | -0.08        | -0.50       | -0.60      | -0.45       | -0.25        | -0.14       | 0.43         |             | 0.40         |             |
| <i>Il1b1</i> | 0.30         | -0.09       | 0.50       | 0.68        | 0.20         | 0.47        | -0.15        | -0.27       |              |             |
|              | Preventive   |             |            |             |              |             |              |             |              |             |

Spearman linear regression analyses. Red and blue colors indicate significant ( $p \leq 0.05$ ) negative and positive correlations respectively. The grey diagonal division separates therapeutic (top), from preventive (bottom) correlations. DSS, dextran sulfate sodium.

**Table S11.** Correlation between inflammatory and oxidative stress mRNA expression in both therapeutic and preventive approaches in the DSS model in males.

|              | <i>Hif1a</i> | <i>Il10</i> | <i>Il6</i> | <i>Nos2</i> | <i>Tgfb1</i> | <i>Tnfa</i> | <i>Vegfa</i> | <i>Tjp1</i> | <i>Il1b1</i> | Therapeutic |
|--------------|--------------|-------------|------------|-------------|--------------|-------------|--------------|-------------|--------------|-------------|
| <i>Hif1a</i> |              | 0.29        | 0.09       | -0.23       | 0.05         | -0.17       | 0.15         | 0.35        | 0.33         |             |
| <i>Il10</i>  | -0.19        |             | 0.25       | -0.10       | 0.46         | -0.13       | 0.36         | 0.41        | 0.56         |             |
| <i>Il6</i>   | 0.70         | 0.47        |            | 0.22        | 0.23         | 0.17        | -0.29        | -0.23       | 0.67         |             |
| <i>Nos2</i>  | -0.26        | -0.48       | -0.46      |             | -0.13        | 0.96        | -0.41        | -0.69       | 0.18         |             |
| <i>Tgfb1</i> | 0.68         | 0.43        | 0.84       | -0.38       |              | -0.06       | 0.55         | 0.37        | 0.64         |             |
| <i>Tnfa</i>  | 0.53         | -0.13       | 0.40       | 0.32        | 0.45         |             | -0.29        | -0.67       | 0.18         |             |
| <i>Vegfa</i> | 0.65         | 0.06        | 0.78       | -0.29       | 0.78         | 0.66        |              | 0.7         | 0.17         |             |
| <i>Tjp1</i>  | 0.23         | -0.71       | -0.25      | 0.47        | -0.04        | 0.18        | 0.00         |             | 0.15         |             |
| <i>Il1b1</i> | 0.45         | 0.59        | 0.57       | -0.36       | 0.66         | 0.49        | 0.46         | -0.33       |              |             |
|              | Preventive   |             |            |             |              |             |              |             |              |             |

Spearman linear regression analyses. Red and blue colors indicate significant ( $p \leq 0.05$ ) negative and positive correlations respectively. The grey diagonal division separates therapeutic (top), from preventive (bottom) correlations. DSS, dextran sulfate sodium.

**Table S12.** Correlation between plasmatic protein levels of CRP and SAA, and mRNA expression of inflammation markers separated by animal model and design.

|     |      |             |         | <i>Il10</i> | <i>Tgfb1</i> | <i>Il6</i>  | <i>Vegfa</i> | <i>Tjp1</i> | <i>Nos2</i> | <i>Tnfa</i> | <i>Hif1a</i> | <i>Il1b1</i> |
|-----|------|-------------|---------|-------------|--------------|-------------|--------------|-------------|-------------|-------------|--------------|--------------|
| CRP | TNBS | Therapeutic | p-value | 0.34        | 0.71         | 0.10        | 0.57         | 0.64        | 0.40        | 0.68        | 0.10         | 0.37         |
|     |      |             | rho     | 0.22        | 0.07         | -0.31       | -0.10        | -0.08       | 0.15        | 0.07        | 0.29         | 0.17         |
|     |      | Preventive  | p-value | 0.15        | 0.81         | 0.29        | 0.24         | 0.81        | 0.07        | 0.96        | 0.35         | 0.12         |
|     |      |             | rho     | 0.32        | -0.05        | 0.22        | 0.23         | -0.05       | 0.36        | 0.01        | 0.18         | 0.31         |
|     | DSS  | Therapeutic | p-value | 0.50        | 0.91         | <b>6E-3</b> | 0.20         | 0.17        | 0.93        | 0.77        | <b>0.02</b>  | <b>2E-3</b>  |
|     |      |             | rho     | 0.13        | -0.02        | <b>0.49</b> | 0.24         | 0.26        | -0.02       | 0.05        | <b>0.43</b>  | <b>0.55</b>  |
|     |      | Preventive  | p-value | 0.81        | 0.14         | <b>0.04</b> | 0.21         | 0.37        | 0.64        | 0.69        | <b>3E-3</b>  | <b>0.04</b>  |
|     |      |             | rho     | -0.05       | 0.30         | <b>0.41</b> | -0.26        | -0.18       | 0.10        | 0.08        | <b>0.56</b>  | <b>0.41</b>  |
| SAA | TNBS | Therapeutic | p-value | 0.60        | 0.62         | 0.10        | <b>0.04</b>  | 0.32        | 0.13        | 0.17        | 0.42         | 0.74         |
|     |      |             | rho     | 0.16        | -0.12        | -0.43       | <b>-0.47</b> | -0.23       | -0.35       | 0.32        | -0.19        | 0.09         |
|     |      | Preventive  | p-value | 0.80        | 0.43         | <b>3E-3</b> | <b>0.04</b>  | 0.67        | 0.31        | 0.32        | 0.40         | <b>8E-4</b>  |
|     |      |             | rho     | -0.07       | 0.20         | <b>0.67</b> | <b>0.48</b>  | 0.11        | 0.25        | 0.25        | 0.21         | <b>0.73</b>  |
|     | DSS  | Therapeutic | p-value | 0.72        | 0.77         | <b>0.00</b> | 0.69         | 0.74        | 0.06        | 0.06        | <b>0.04</b>  | <b>0.00</b>  |
|     |      |             | rho     | -0.10       | -0.08        | <b>0.87</b> | -0.10        | 0.09        | 0.47        | 0.46        | <b>0.50</b>  | <b>0.91</b>  |
|     |      | Preventive  | p-value | 0.70        | 0.32         | 0.06        | 0.49         | 0.09        | 0.60        | 0.46        | 0.31         | 0.19         |
|     |      |             | rho     | 0.11        | 0.25         | 0.45        | 0.17         | -0.41       | 0.13        | 0.19        | 0.25         | 0.32         |

Spearman linear regression analyses. Red and blue colors indicate significant ( $p \leq 0.05$ ) negative and positive correlations respectively. CRP, C-reactive protein; DSS, dextran sulfate sodium; SAA, Serum amyloid antigen; TNBS, trinitrobenzenesulfonic acid.

**Table S13.** Correlation between plasmatic CRP and SAA, and mRNA expression of inflammation markers separated by model, trial and sex.

|     |   |      |             |         | <i>Il10</i> | <i>Tgfb1</i> | <i>Il6</i>   | <i>Vegfa</i> | <i>Tjp1</i> | <i>Nos2</i>  | <i>Tnfa</i> | <i>Hif1a</i> | <i>Il1b1</i> |
|-----|---|------|-------------|---------|-------------|--------------|--------------|--------------|-------------|--------------|-------------|--------------|--------------|
| CRP | F | TNBS | Therapeutic | p-value | 0.71        | 0.7          | 0.27         | 1.00         | 0.96        | 0.56         | 0.46        | 0.53         | 0.64         |
|     |   |      |             | rho     | 0.14        | 0.11         | -0.29        | 0.00         | 0.01        | -0.16        | 0.20        | 0.17         | 0.14         |
|     |   |      | Preventive  | p-value | 0.52        | 0.37         | 0.80         | 0.91         | 0.31        | 0.17         | 0.43        | 0.71         | 0.40         |
|     |   |      |             | rho     | -0.22       | -0.25        | -0.07        | 0.03         | -0.28       | 0.38         | -0.22       | -0.10        | 0.24         |
|     |   | DSS  | Therapeutic | p-value | 0.35        | 0.37         | <b>0.01</b>  | <b>1E-3</b>  | <b>0.00</b> | <b>8E-5</b>  | 0.06        | <b>8E-3</b>  | 0.07         |
|     |   |      |             | rho     | 0.26        | 0.25         | <b>0.63</b>  | <b>0.78</b>  | <b>0.87</b> | <b>-0.84</b> | -0.50       | <b>0.66</b>  | 0.48         |
|     |   |      | Preventive  | p-value | 0.47        | 0.18         | <b>0.03</b>  | 0.53         | 0.26        | 0.14         | 0.08        | 0.1          | 0.11         |
|     |   |      |             | rho     | 0.24        | 0.41         | <b>0.64</b>  | -0.20        | -0.36       | 0.45         | 0.52        | 0.5          | 0.49         |
|     | M | TNBS | Therapeutic | p-value | 0.79        | 0.98         | 0.28         | 0.72         | 0.63        | 0.37         | 0.59        | 0.08         | 0.65         |
|     |   |      |             | rho     | 0.1         | 0.01         | -0.34        | -0.09        | -0.13       | 0.23         | -0.14       | 0.43         | 0.12         |
|     |   |      | Preventive  | p-value | 0.12        | 0.77         | 0.31         | 0.25         | 0.54        | 0.64         | 0.99        | 0.20         | 0.32         |
|     |   |      |             | rho     | 0.50        | 0.10         | 0.34         | 0.36         | 0.20        | -0.15        | -0.01       | 0.40         | 0.31         |
|     |   | DSS  | Therapeutic | p-value | 0.52        | 0.43         | 0.66         | <b>0.02</b>  | 0.16        | 0.79         | 0.85        | 0.49         | 0.55         |
|     |   |      |             | rho     | 0.18        | 0.22         | -0.13        | <b>0.61</b>  | 0.38        | -0.08        | 0.05        | 0.19         | 0.17         |
|     |   |      | Preventive  | p-value | 0.59        | 0.41         | 0.89         | 0.18         | 0.39        | 0.55         | 0.21        | 0.67         | 0.77         |
|     |   |      |             | rho     | -0.17       | -0.24        | 0.04         | -0.38        | -0.25       | -0.17        | -0.36       | 0.13         | -0.09        |
| SAA | F | TNBS | Therapeutic | p-value | 0.50        | 0.27         | <b>0.02</b>  | 0.25         | 0.49        | 0.25         | 0.88        | 0.49         | 0.84         |
|     |   |      |             | rho     | 0.32        | -0.42        | <b>-0.77</b> | -0.43        | -0.27       | -0.43        | 0.07        | -0.27        | 0.10         |
|     |   |      | Preventive  | p-value | 0.70        | 0.08         | <b>0.02</b>  | <b>0.04</b>  | 0.71        | <b>0.02</b>  | <b>0.01</b> | 0.22         | <b>0.01</b>  |
|     |   |      |             | rho     | -0.17       | 0.59         | <b>0.76</b>  | <b>0.66</b>  | -0.14       | <b>0.76</b>  | <b>0.78</b> | 0.43         | <b>0.77</b>  |
|     |   | DSS  | Therapeutic | p-value | 0.18        | 0.31         | <b>3E-3</b>  | <b>0.03</b>  | <b>0.01</b> | <b>0.02</b>  | 0.15        | 0.12         | <b>3E-3</b>  |
|     |   |      |             | rho     | 0.50        | 0.38         | <b>0.88</b>  | <b>0.73</b>  | <b>0.82</b> | <b>-0.78</b> | -0.53       | 0.56         | <b>0.88</b>  |
|     |   |      | Preventive  | p-value | 0.50        | 0.50         | <b>0.04</b>  | 0.75         | 0.10        | 0.06         | 0.36        | 0.98         | <b>0.02</b>  |
|     |   |      |             | rho     | 0.32        | 0.29         | <b>0.76</b>  | -0.14        | -0.64       | 0.71         | 0.38        | -0.02        | <b>0.83</b>  |
|     | M | TNBS | Therapeutic | p-value | 0.80        | 0.63         | 0.66         | <b>0.04</b>  | 0.69        | 0.20         | 0.17        | 0.71         | 0.54         |
|     |   |      |             | rho     | 0.14        | 0.16         | -0.21        | <b>-0.64</b> | -0.14       | -0.42        | 0.45        | -0.13        | 0.22         |
|     |   |      | Preventive  | p-value | 0.84        | 1.00         | 0.15         | 0.24         | 0.30        | <b>0.05</b>  | 0.39        | 0.98         | 0.11         |
|     |   |      |             | rho     | -0.11       | 0.00         | 0.57         | 0.48         | 0.43        | <b>-0.74</b> | -0.36       | -0.02        | 0.62         |
|     |   | DSS  | Therapeutic | p-value | 0.75        | 0.30         | 0.15         | 0.33         | 0.88        | 0.46         | 0.54        | 0.62         | 0.14         |
|     |   |      |             | rho     | 0.14        | 0.43         | 0.57         | -0.40        | -0.07       | 0.31         | 0.26        | 0.21         | 0.64         |
|     |   |      | Preventive  | p-value | 0.70        | 0.84         | 0.22         | 0.41         | 0.84        | 0.43         | 1.00        | 0.22         | 0.79         |
|     |   |      |             | rho     | -0.17       | 0.08         | 0.43         | 0.30         | -0.08       | -0.28        | 0.01        | 0.43         | -0.10        |

Spearman linear regression analyses. Red and blue colors indicate significant ( $p \leq 0.05$ ) negative and positive correlations respectively. CRP, C-reactive protein; DSS, dextran sulfate sodium; SAA, Serum amyloid antigen; TNBS, trinitrobenzenesulfonic acid.

**Table S14:** Macroscopic colon examination score (Wallace).

| Score                                                                | Macroscopic colon examination (Wallace)           |
|----------------------------------------------------------------------|---------------------------------------------------|
| 0                                                                    | no damage                                         |
| 1                                                                    | hyperaemia without ulcers                         |
| 2                                                                    | hyperaemia and wall thickening without ulcers     |
| 3                                                                    | one ulceration site without wall thickening       |
| 4                                                                    | two or more ulceration sites                      |
| 5                                                                    | 0.5 cm extension of inflammation or major damage  |
| 6                                                                    | 1 cm extension of inflammation or severe damage   |
| <b>the score was then increased by 1 up to a maximal score of 10</b> |                                                   |
| 10*                                                                  | *every 0.5 cm of damage                           |
|                                                                      | *stricture presence                               |
|                                                                      | *presence of mild or severe adhesion respectively |
